# Supplementary material
Source: Springer Nature journal article supplement (https://www.springermedizin.de/resource/supplementary/12967_2011_1054_MOESM6_ESM.pdf/9573628)
Supplement: MOESM6 [file 9573628]

Table 1 A table of INF- $\gamma$  secretion (pg/ml) in response to HLA matched and mismatched cell lines and to T2 cell pulsed with peptide recognized by the transduced TCR

|        |            | Melanoma Cell Lines |      | T2 cells pulsed with peptide ( $\mu$ M/ml) |      |                  |         |       |        |      |
|--------|------------|---------------------|------|--------------------------------------------|------|------------------|---------|-------|--------|------|
|        |            | 938                 | 624  | Irrelevant Peptide                         |      | Specific Peptide |         |       |        |      |
| TCR    | Bioreactor | A2-                 | A2+  | 1.0                                        | 1.0  | 0.1              | 0.01    | 0.001 | 0.0001 |      |
| NY-ESO | Patient 1  | Static Bags         | 40   | 19300                                      | 44   | >126650          | 45600   | 5095  | 1080   | 136  |
|        |            | Wave                | 68   | 46950                                      | 128  | >182100          | 83200   | 23350 | 2770   | 646  |
|        | Patient 2  | Static Bags         | 345  | 39700                                      | 694  | >241000          | 52250   | 4195  | 985    | 339  |
|        |            | Wave                | 410  | 40700                                      | 1876 | >219650          | 58400   | 8650  | 2374   | 1302 |
|        | Patient 3  | Static Bags         | 79   | >31250                                     | 84   | >84800           | 23850   | 2425  | 242    | 40   |
|        |            | Wave                | 78   | >30150                                     | 120  | >83000           | 31500   | 4830  | 534    | 139  |
|        | Patient 4  | Static Bags         | 16   | 4725                                       | 27   | 11045            | 1075    | 166   | 45     | 29   |
|        |            | Wave                | 18   | 5770                                       | 43   | 12445            | 1610    | 236   | 54     | 33   |
|        | Patient 5  | Static Bags         | 7    | 11780                                      | 855  | >113300          | 25555   | 2635  | 1346   | 14   |
|        |            | Wave                | 1201 | 16140                                      | 147  | >125300          | 63400   | 8230  | 469    | 177  |
|        | Patient 6  | Static Bags         | 129  | 3505                                       | 105  | 9535             | 1080    | 147   | 40     | 12   |
|        |            | Wave                | 36   | 4000                                       | 99   | 26950            | 2560    | 315   | 118    | 80   |
|        | Patient 7  | Static Bags         | 23   | 6565                                       | 40   | 24750            | 3445    | 818   | 393    | 159  |
|        |            | Wave                | 78   | 3550                                       | 290  | >45100           | 6240    | 911   | 441    | 204  |
| MART-1 | Patient 8  | Static Bags         | 98   | >77225                                     | 160  | >58200           | 11480   | 1375  | 544    | NA   |
|        |            | Wave                | 148  | 91625                                      | 547  | 62200            | 20875   | 3630  | 1510   | NA   |
|        | Patient 9  | Static Bags         | 12   | 66500                                      | 30   | >180600          | 93700   | 370   | 490    | NA   |
|        |            | Wave                | 65   | >162700                                    | 197  | >260700          | >154600 | 3000  | 2897   | NA   |
| gp154  | Patient 10 | Static Bags         | 18   | 32950                                      | 22   | NA               | 4360    | 2600  | 739    | 479  |
|        |            | Wave                | 18   | 42650                                      | 55   | NA               | 8075    | 5290  | 1785   | 684  |
